# Supplementary material
Source: PubMed Central journal article supplement (PMC9341178)
Supplement: bcr-2021-247524supp001.pdf [file bcr-2021-247524supp001.pdf]

## Supplemental Materials

Table 2. Summary of Case Reports of iTTP and COVID-19 Infection.

| Author          | Age, Gender | COVID-19 diagnosis                   | TTP de novo or relapse | TTP Diagnosis                              | Clinical/Laboratory Presentation                                                                     | Treatment                                                  | Outcome                                                   |
|-----------------|-------------|--------------------------------------|------------------------|--------------------------------------------|------------------------------------------------------------------------------------------------------|------------------------------------------------------------|-----------------------------------------------------------|
| AL-Ansarin      | 51 M        | Positive NP swab                     | De novo                | Clinical                                   | Hgb nadir 60, Plt 45-50, LDH 757, Cr 227 (CRRT), ischemic stroke                                     | TPE                                                        | Survived                                                  |
| Albiol          | 57 F        | Negative PCR, positive IgG           | De novo                | ADAMTS13 activity <10%, positive inhibitor | Hgb 69, Plt 13, LDH 1594, Cr 63.66                                                                   | TPE, steroids, IVIG, plasma transfusion                    | Unknown                                                   |
| Altowyan        | 39 M        | Positive test                        | De novo                | PLASMIC score = 6                          | Hgb 77, Plt 6, LDH 1600, Cr 77, ischemic stroke, acute psychosis                                     | TPE, steroids, rituximab, COVID-19 management              | Survived                                                  |
| Aminimogh-addam | 21 F        | Positive NP swab                     | De novo                | Clinical                                   | Hgb 50, Plt 21, LDH 1910, Cr 495.15                                                                  | TPE                                                        | Survived                                                  |
| Beaulieu        | 70 M        | Positive                             | De novo                | ADAMTS13 activity <10%, antibody positive  | Hgb 60, Plt 18, LDH 1422, Cr 106, seizure, confusion                                                 | TPE, steroids, plasma transfusion                          | Survived                                                  |
| Capecchi        | 55 F        | Swab negative x2, positive IgG       | Relapse                | ADAMTS13 activity <10%, antibody positive  | Hgb 74, Plt 14, LDH 18015, Cr 276.75, troponin 1426 ng/mL, ischemic stroke with petechial hemorrhage | TPE, steroids, plasma transfusion, caplacizumab            | Survived                                                  |
| Cohen           | 62 F        | 1st swab negative, 2nd swab positive | De novo                | ADAMTS13 activity <10%, antibody positive  | Hgb 95, Plt 41, LDH 937, Cr 87.54                                                                    | TPE, steroids, plasma transfusion, caplacizumab, rituximab | 2 TTP relapses, survived                                  |
| Darnahal        | 56 F        | Positive NP swab                     | De novo                | ADAMTS13 activity <10%, antibody positive  | Hgb 60, Plt 41, LDH 2245, ICH                                                                        | TPE, rituximab                                             | Deceased (severe lung involvement and hemorrhagic stroke) |
| Dhingra         | 35 F        | Positive NP and oropharyngeal swab   | De novo                | ADAMTS13 activity <10%, inhibitor positive | Hgb 82.5, Plt 20, LDH 10977, Cr 66.32, ischemic stroke, seizure                                      | TPE, vincristine, rituximab                                | Survived                                                  |

|             |      |                          |         |                                                    |                                                                                      |                                                                                                           |                                                                              |
|-------------|------|--------------------------|---------|----------------------------------------------------|--------------------------------------------------------------------------------------|-----------------------------------------------------------------------------------------------------------|------------------------------------------------------------------------------|
| Dorooshi    | 81 F | Positive PCR             | De novo | Clinical                                           | Hgb 72, Plt 52, LDH 2237, Cr 786.94 to 804.62, loss of consciousness                 | Steroids, plasma transfusion                                                                              | Deceased (cardiac arrest)                                                    |
| Hindilerden | 74 F | Positive swab            | De novo | ADAMTS13 activity <10%, inhibitor positive         | Hgb 66, Plt 48, LDH 1108, confusion                                                  | TPE, steroids                                                                                             | Survived                                                                     |
| Law         | 47 F | Positive NP swab         | De novo | ADAMTS13 activity <10%, inhibitor positive         | Hgb 70, Plt 14, LDH 2229, Cr 88.42, seizure                                          | TPE, caplacizumab                                                                                         | Survived                                                                     |
| Maharaj     | 69 F | Positive NP PCR          | Relapse | Clinical, ADAMTS13 deficient at COVID-19 diagnosis | Left femoral catheter-associated deep vein thrombosis (2weeks after COVID diagnosis) | Relapse 1: TPE, steroids<br>Relapse 2: TPE, steroids, intolerant to rituximab<br>Relapse 3: TPE, steroids | 3 TTP relapses, deceased (refractory hypoxia and severe multi-organ failure) |
| Nicolotti   | 44 F | Positive pharyngeal swab | De novo | ADAMTS13 activity <10%, antibody positive          | Plt 7, LDH 2961, Cr 203.37, confusion, left hemiparesis                              | TPE, steroids, rituximab, caplacizumab                                                                    | Survived                                                                     |
| Shankar     | 30 M | Positive PCR             | De novo | ADAMTS13 activity <10%, inhibitor positive         | Hgb 137, Plt 9, LDH 1375, Cr 133.51                                                  | TPE, steroids, plasma transfusion, caplacizumab                                                           | Survived                                                                     |
| Tehrani-1   | 25 F | Lung imaging and PCR     | De novo | ADAMTS13 antigen low, antibody positive            | Hgb 70, Plt 10.5, LDH 3465                                                           | TPE                                                                                                       | Survived                                                                     |
| Tehrani-2   | 56 F | Lung imaging and PCR     | De novo | ADAMTS13 antigen low, antibody positive            | Hgb 60, Plt 41, LDH 1520, hemorrhagic stroke                                         | TPE, rituximab                                                                                            | Deceased (hemorrhagic stroke)                                                |
| Tehrani-3   | 57 F | Lung imaging and PCR     | De novo | ADAMTS13 antigen normal, antibody positive         | Hgb 79, Plt 98, LDH 1150                                                             | Plasma transfusion (TPE unavailable), IVIG                                                                | Survived                                                                     |
| Tehrani-4   | 38 M | Lung imaging and PCR     | De novo | ADAMTS13 antigen low, antibody positive            | Hgb 80, Plt 5, LDH 545                                                               | TPE, rituximab, IVIG                                                                                      | Survived                                                                     |

|       |      |                 |         |                 |                |                                                                                                      |                                                                                                                        |
|-------|------|-----------------|---------|-----------------|----------------|------------------------------------------------------------------------------------------------------|------------------------------------------------------------------------------------------------------------------------|
| Verma | 21 M | Positive RT-PCR | De novo | PLASMIC score=7 | Hgb 59, Plt 10 | Plasma transfusion (TPE intolerance), dexamethasone (for COVID-19 infection and HLH), IVIG (for HLH) | Developed HLH; deceased (pneumothorax, secondary lung infection, progressive cachexia and possible progression of TTP) |
|-------|------|-----------------|---------|-----------------|----------------|------------------------------------------------------------------------------------------------------|------------------------------------------------------------------------------------------------------------------------|

**Abbreviations:** M male and F female; NP nasopharyngeal; Hgb hemoglobin (g/L); Plt platelet ( $\times 10^9$ /L); LDH lactate dehydrogenase (U/L); Cr creatinine ( $\mu\text{mol/L}$ ); CRRT continuous renal replacement therapy; TPE therapeutic plasma exchange; IVIG intravenous gammaglobulin; ICH intracranial hemorrhage; HLH hemophagocytic lymphohistiocytosis.

**Note:** The literature search was last updated on January 30, 2022.

**Table 3. Summary of Case Reports of iTTP Following COVID-19 Vaccination.**

| Report             | Patient Age (years) and Gender | Type of COVID19 Vaccine             | First or Second Dose | Time to TTP Presentation | De novo vs Relapse TTP |
|--------------------|--------------------------------|-------------------------------------|----------------------|--------------------------|------------------------|
| Al-Ahmad et al     | 37, male                       | AstraZeneca Oxford COVID-19 vaccine | First                | 3 weeks                  | De novo                |
| Alislambouli et al | 61, male                       | BNT162b2 (Pfizer)                   | First                | 5 days                   | De novo                |
| Chamarti et al     | 80, male                       | BNT162b2 (Pfizer)                   | Second               | 2 weeks                  | De novo                |
| Fang et al         | 70s, male                      | mRNA-1273 (Moderna)                 | First                | 7 days                   | Relapse                |
| de Bruijin et al   | 38, female                     | BNT162b2 (Pfizer)                   | Second               | 3 weeks                  | De novo                |
| Francisco et al    | 57, male                       | mRNA-1273 (Moderna)                 | Second               | 7 weeks                  | Relapse                |
| Herrman et al      | “elderly”, female              | mRNA-1273 (Moderna)                 | Third                | 8 days                   | De novo                |
| Karabulut et al    | 48, male                       | mRNA-1273 (Moderna)                 | First                | 5 days                   | Relapse                |
| Li et al           | 50, female                     | ChAdOx1 nCoV-19 vaccine (Vaxzevria) | First                | 12 days                  | De novo                |
| Osmanodia et al    | 25, male                       | mRNA-1273 Moderna Spikevax          | First                | 13 days                  | De novo                |
| Sissa et al        | 48, female                     | BNT162b2 (Pfizer)                   | Second               | 6 days                   | Relapse                |
| Pavenski           | 84, male                       | BNT162b2 (Pfizer)                   | First                | 7 days                   | Relapse                |
| Waqar et al        |                                | BNT162b2 (Pfizer)                   | Second               | 1 week                   | De novo                |
| Yocum et al        | 62, female                     | Ad26.COVS.2.S (Johnson & Johnson)   | N/A                  | 37 days                  | De novo                |
| Yoshida et al      | 57, male                       | BNT162b2 (Pfizer)                   | First                | 2 weeks                  | De novo                |

**Note:** The literature search was last updated on January 30, 2022. Only cases where TTP diagnosis was confirmed by ADAMTS13 activity testing were included.

**Additional References:**

1. Shankar K, Huffman D, Peterson C, Yasir M, Kaplan R. A Case of COVID-19 Induced Thrombotic Thrombocytopenic Purpura. *Cureus*. 2021; 13(7): e16311.
2. Al-Ahmad M, Al-Rasheed M, Shalaby NAB. Acquired thrombotic thrombocytopenic purpura with possible association with AstraZeneca-Oxford COVID-19 vaccine. *eJHaem*. 2021; 1-3.
3. Alislambouli M, Victoria AV, Matta J, Yin F. Acquired thrombotic thrombocytopenic purpura following Pfizer COVID-19 vaccination. *eJHaem*. 2021; 1-4.
4. Chamarti K, Dar K, Reddy A, Gundlapalli A, Mourning D, Bajaj K. Thrombotic Thrombocytopenic Purpura Presentation in an Elderly Gentleman Following COVID Vaccine Circumstances. *Cureus*. 2021; 13(7):e16619.
5. Karabulut K, Andronikashvili A, Kapici AH. Recurrence of Thrombotic Thrombocytopenic Purpura after mRNA-1273 COVID-19 Vaccine Administered Shortly after COVID-19. *Case Reports in Hematology*. 2021; Article ID 4130138.
6. Lee HP, Selvaratnam V, Rajasuriar JS. Thrombotic thrombocytopenic purpura after ChAdOx1 nCoV-19 vaccine. *BMJ Case Rep*. 2021; 14:e246049.
7. Osmanodja B, Schreiber A, Schrezenmeier E, Seelow E. First diagnosis of thrombotic thrombocytopenic purpura after SARS-CoV-2 vaccine – case report. *BMC Nephrology*. 2021; 22:411.
8. Waqar SHB, Khan AA, Memon S. Thrombotic thrombocytopenic purpura: a new menace after COVID bnt162b2 vaccine. *Int J Hematol*. 2021; 114:626-629.
9. Yoshida K, Sakaki A, Matsuyama Y, Mushino T, Matsumoto M, Sonoki T, Tamura S. Acquired Thrombotic Thrombocytopenic Purpura Following BNT162b2 mRNA Coronavirus Disease Vaccination in a Japanese Patient. *Intern Med Advance Publication*. 2021; doi: 10.2169/internalmedicine.8568-21.
10. Herrman E, Ghimire B, Chisti MM. Thrombotic thrombocytopenic purpura following administration of the Moderna booster vaccine. *BMJ Case Rep*. 2022;15(3):e247576.
11. Francisco MT, Kaufman AE, Northfelt D, Padrnos L, Rosenthal AC, et al. Relapsed Refractory Acquired Thrombotic Thrombocytopenic Purpura (aTTP) Following COVID-19 Vaccination. *Blood*. 2021;138:4218.
